# Supplementary material for: Protamine neutralizes chondroitin sulfate proteoglycan-mediated inhibition of oligodendrocyte differentiation
Source: PubMed Central journal article supplement (PMC5720700; doi:10.1371/journal.pone.0189164), 2017-12-07
Supplement: pone.0189164.s002.pdf [file pone.0189164.s002.pdf]

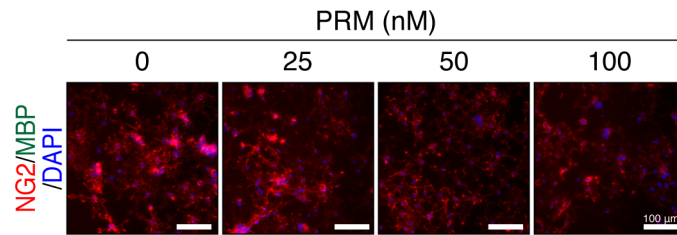

**S2 Fig. PRM alone without thyroid hormones did not induce cell differentiation in OL1 cells.** Double-immunofluorescence labeling of OL1 cells. OL1 cells were cultured in non-differentiated medium without thyroid hormones on dishes coated with poly-*L*-ornithine for 10 days, and examined as in Figure 3. Scale bars, 100  $\mu$ m.
