# Supplementary material for: Protamine neutralizes chondroitin sulfate proteoglycan-mediated inhibition of oligodendrocyte differentiation
Source: PubMed Central journal article supplement (PMC5720700; doi:10.1371/journal.pone.0189164), 2017-12-07
Supplement: pone.0189164.s004.pdf [file pone.0189164.s004.pdf]

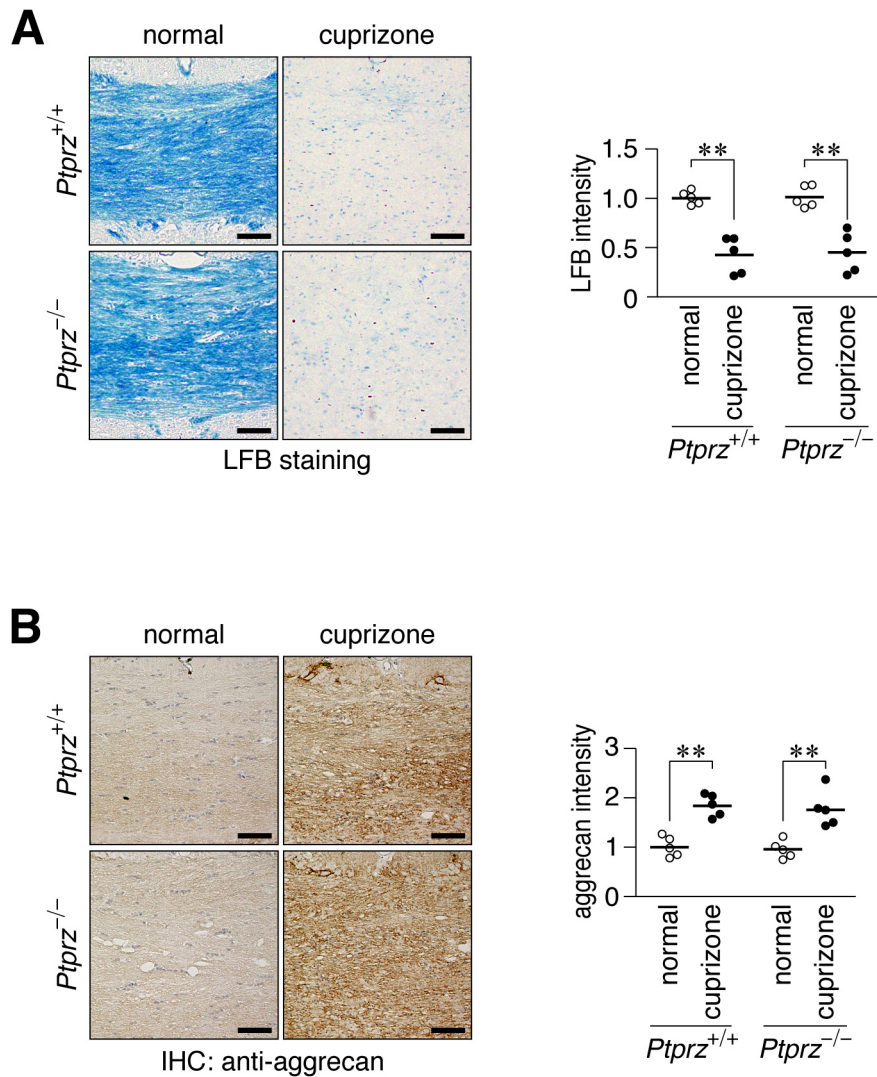

**S4 Fig. Aggrecan expression was induced following cuprizone-induced demyelination.** (A) LFB staining of the dorsal corpus callosum. Wild-type ( $Ptprz^{+/+}$ ) and  $Ptprz$ -deficient ( $Ptprz^{-/-}$ ) mice were fed a cuprizone-containing diet for 6 weeks (cuprizone) or were maintained on the regular diet (normal). Scale bars, 50  $\mu$ m. The plot shows the quantification of staining intensity in the dorsal corpus callosum normalized to the staining intensity in normal  $Ptprz^{+/+}$  mice. \*\*,  $p < 0.01$ , significant difference between the indicated groups (analysis of variance with Bonferroni's *post-hoc* tests). (B) Anti-aggrecan staining of the sections shown in A. Scale bars, 50  $\mu$ m. The plot shows the staining intensity in the dorsal corpus callosum normalized to normal  $Ptprz^{+/+}$  ones. \*\*,  $p < 0.01$ , significant difference between the indicated groups (analysis of variance with Bonferroni's *post-hoc* tests).
