# Supplementary material for: Protamine neutralizes chondroitin sulfate proteoglycan-mediated inhibition of oligodendrocyte differentiation
Source: PubMed Central journal article supplement (PMC5720700; doi:10.1371/journal.pone.0189164), 2017-12-07
Supplement: pone.0189164.s005.pdf [file pone.0189164.s005.pdf]

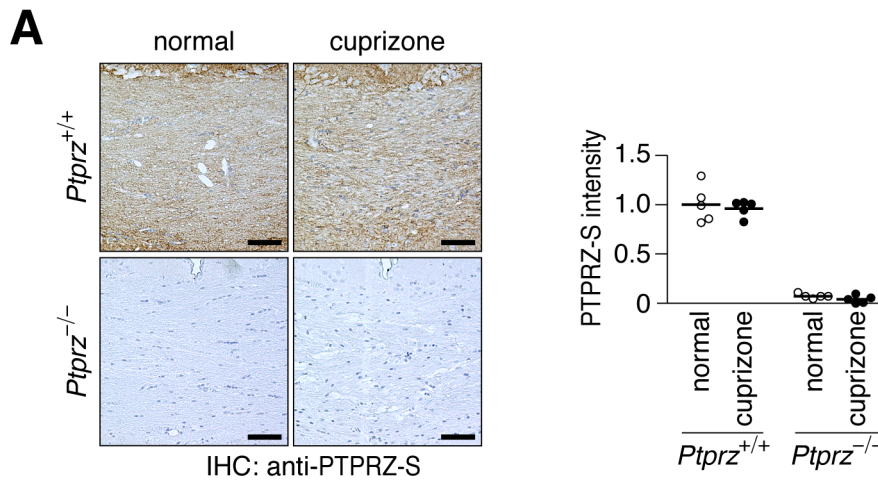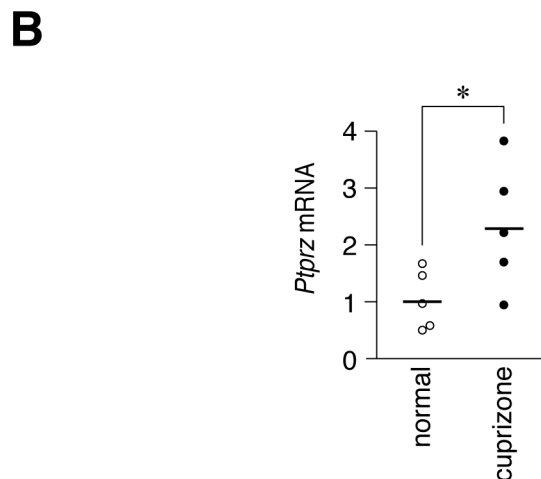

**S5 Fig. PTPRZ expression in cuprizone-lesioned mouse brains.** (A) Anti-PTPRZ-S staining of sections shown in supplementary figure S4. Scale bars, 50  $\mu$ m. The plot shows the staining intensity in the dorsal corpus callosum normalized to normal *Ptpz*<sup>+/+</sup> ones. \*\*,  $p < 0.01$ , significant difference between the indicated groups (analysis of variance with Bonferroni's *post-hoc* tests). Aggrecan immunoreactivity in the corpus callosum. (B) Quantitative RT-PCR analyses. Total RNA was extracted from the paraffin-embedded tissue sections of *Ptpz*<sup>+/+</sup> mice shown in A, and then subjected to quantitative RT-PCR. The plots show the mRNA expression of *Ptpz* as normalized to *Gapdh* expression. \*,  $p < 0.05$  (Student's *t*-test).
