# Supplementary material for: Protamine neutralizes chondroitin sulfate proteoglycan-mediated inhibition of oligodendrocyte differentiation
Source: PubMed Central journal article supplement (PMC5720700; doi:10.1371/journal.pone.0189164), 2017-12-07
Supplement: pone.0189164.s006.pdf [file pone.0189164.s006.pdf]

**A**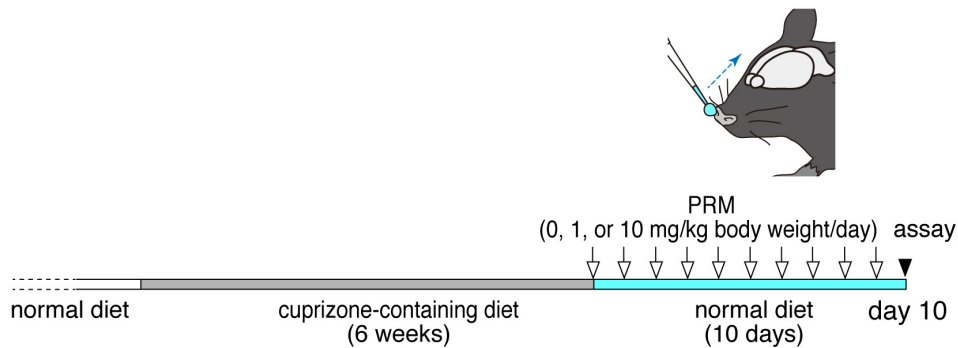**B**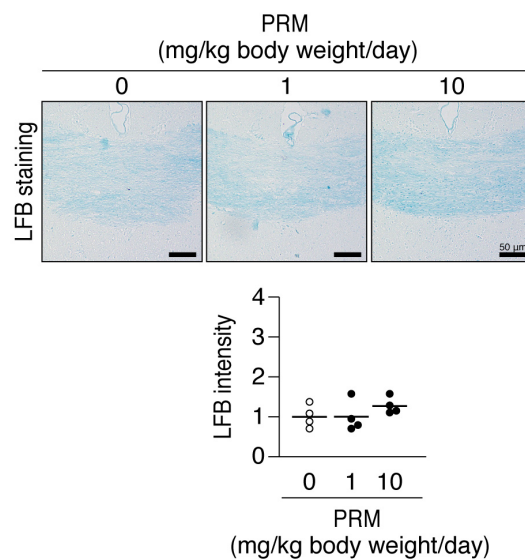

**S6 Fig. Transnasal administration of PRM to cuprizone-lesioned mice.** (A) Schematic drawing representing the treatment schedule. Mice were fed a cuprizone-containing diet for 6 weeks. At the end of the period, mice were treated daily with PRM (0, 1, or 10 mg/kg body weight per day) by its transnasal administration for 10 days. (B) LFB staining. The plot shows the intensity of LFB staining in the dorsal corpus callosum. No significant differences were detected by a one-way analysis of variance. Scale bars, 50 µm.
