# Supplementary material for: Protamine neutralizes chondroitin sulfate proteoglycan-mediated inhibition of oligodendrocyte differentiation
Source: PubMed Central journal article supplement (PMC5720700; doi:10.1371/journal.pone.0189164), 2017-12-07
Supplement: pone.0189164.s009.pdf [file pone.0189164.s009.pdf]

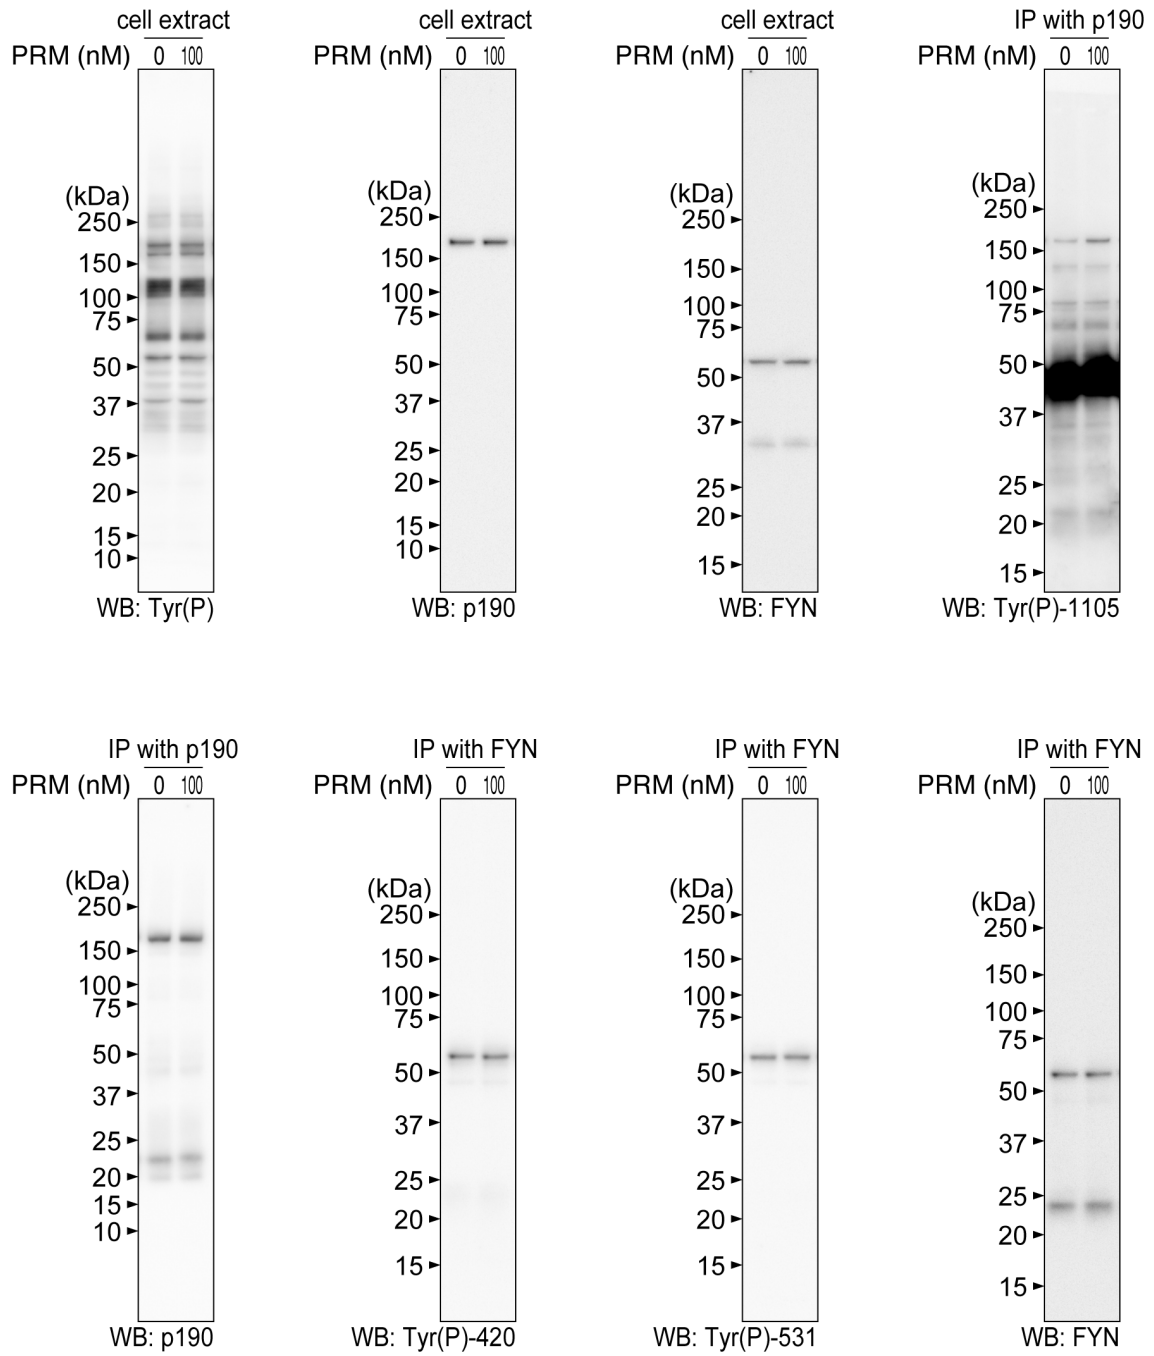

**S9 Fig. Full-length blots for Fig 5.**
